# Supplementary material for: One-pot achievement of MnO2/Fe2O3 nanocomposites for the oxygen reduction reaction with enhanced catalytic activity
Source: Royal Society of Chemistry journal article supplement (doi:10.1039/c9nj04317a), 2019-01-01
Supplement: c9nj04317a1.pdf [file c9nj04317a1.pdf]

-Supporting information-

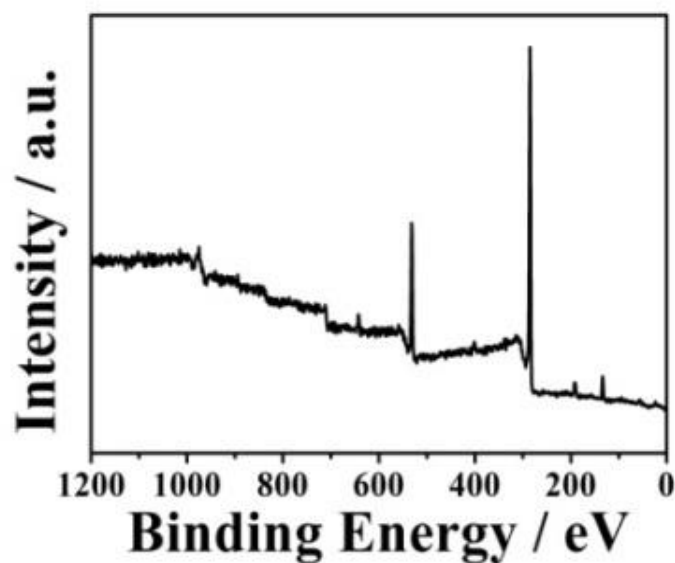

Figure S1 XPS survey spectrum of MnO<sub>2</sub>/Fe<sub>2</sub>O<sub>3</sub>.

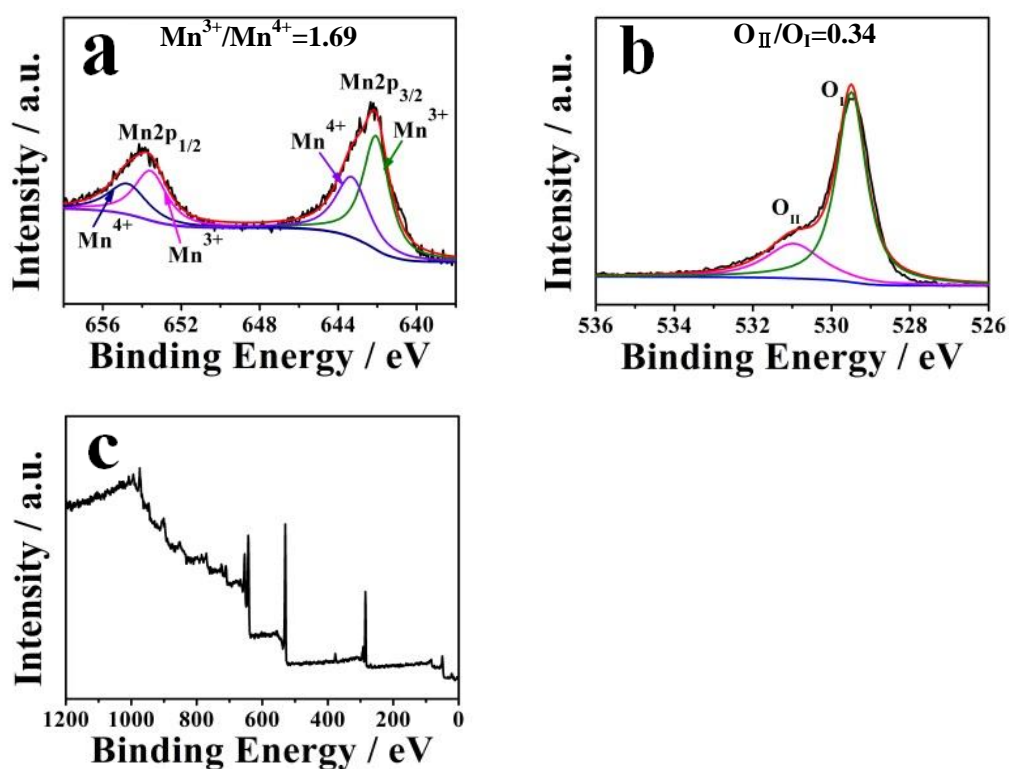

Figure S2 High-resolution Mn 2p (a) and O 1s (b) spectra and XPS survey spectrum (c) of pure MnO<sub>2</sub>.

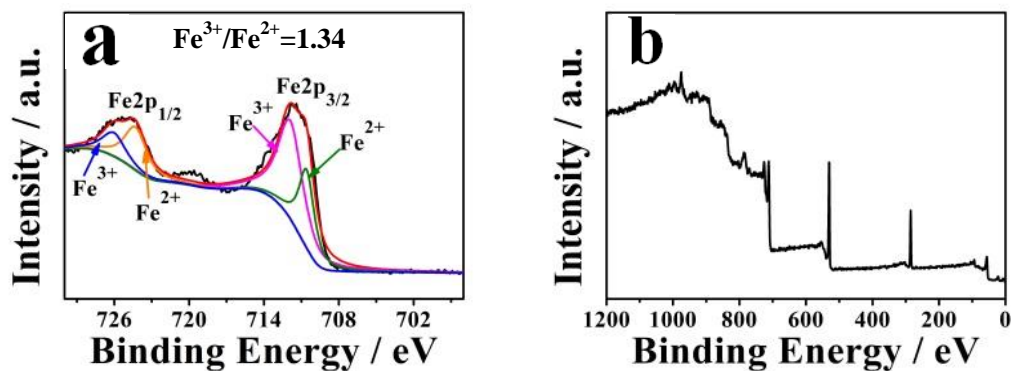

**Figure S3** High-resolution Fe 2p (a) and XPS survey spectra (b) of pure  $\text{Fe}_2\text{O}_3$ .

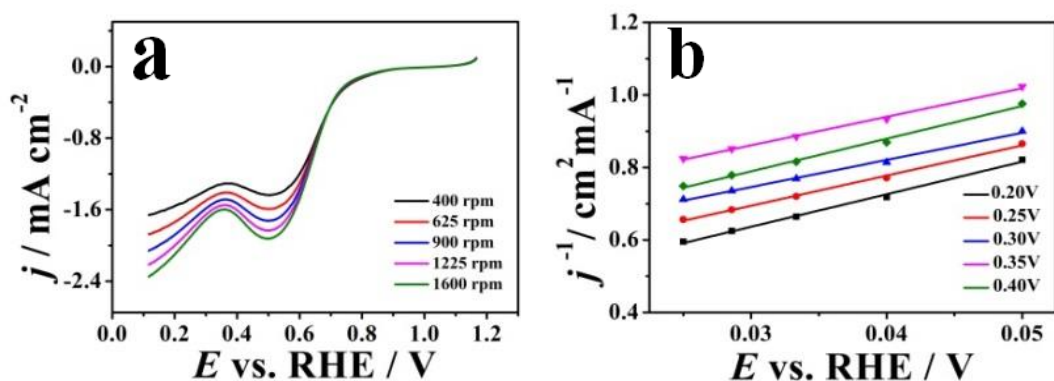

**Figure S4** (a) LSV curves of pure  $\text{MnO}_2$  measured at different rotating rates; (b) Corresponding K-L plots of pure  $\text{MnO}_2$  in various potential range (vs. RHE, the inset gives the calculated electron transfer number at various potentials).

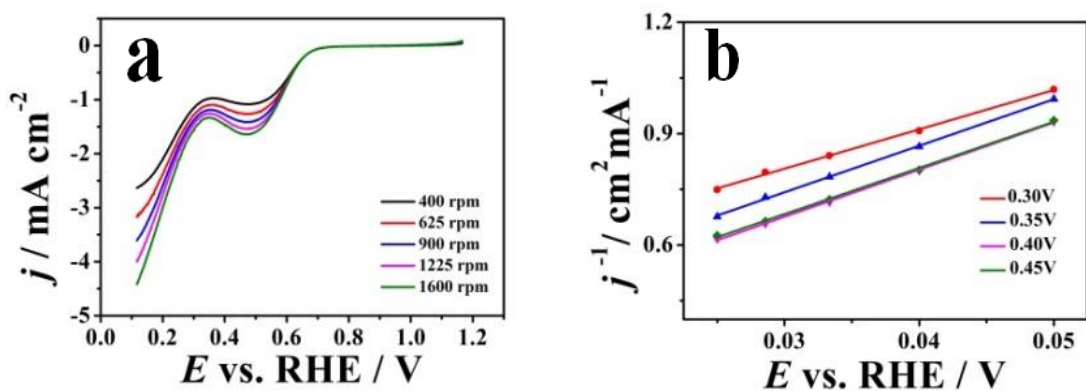

**Figure S5** (a) LSV curves of pure  $\text{Fe}_2\text{O}_3$  measured at different rotating rates; (b) Corresponding K-L plots of pure  $\text{Fe}_2\text{O}_3$  in various potential range (vs. RHE, the inset gives the calculated electron transfer number at various potentials).

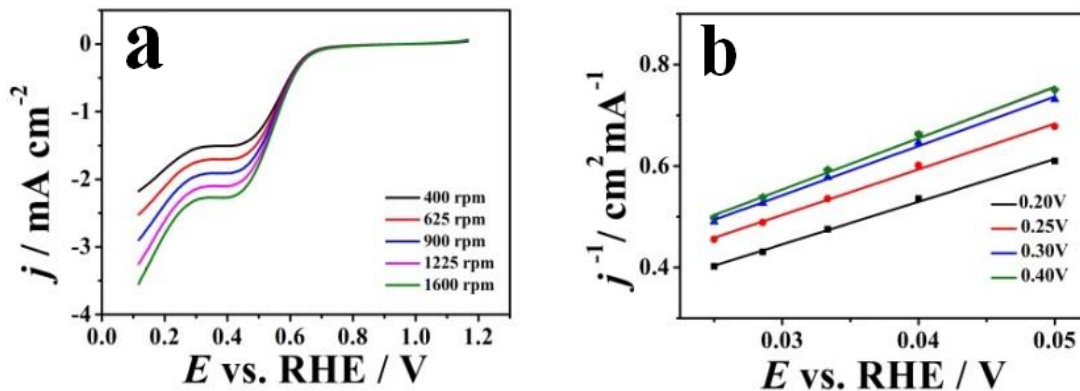

**Figure S6** (a) LSV curves of MnO<sub>2</sub>/Fe<sub>2</sub>O<sub>3</sub>-400 measured at different rotating rates; (b) Corresponding K-L plots of MnO<sub>2</sub>/Fe<sub>2</sub>O<sub>3</sub>-400 in various potential range (vs. RHE, the inset gives the calculated electron transfer number at various potentials).

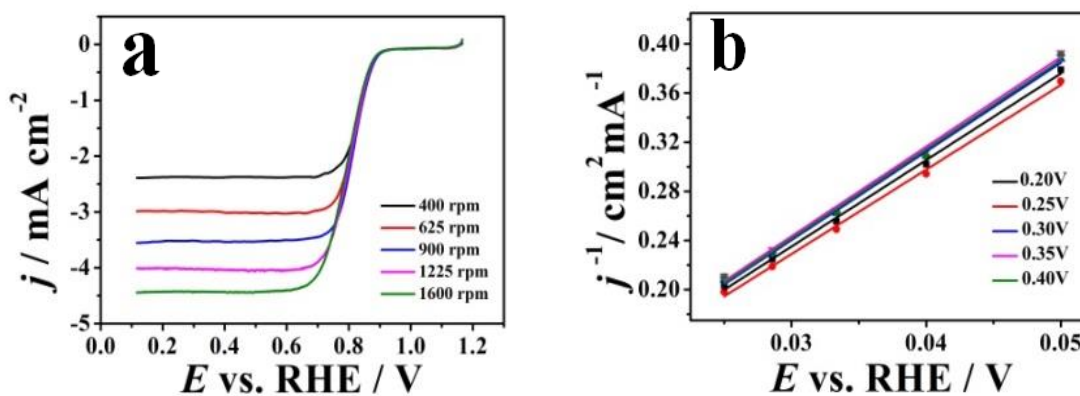

**Figure S7** (a) LSV curves of MnO<sub>2</sub>/Fe<sub>2</sub>O<sub>3</sub>-600 measured at different rotating rates; (b) Corresponding K-L plots of MnO<sub>2</sub>/Fe<sub>2</sub>O<sub>3</sub>-600 in various potential range (vs. RHE, the inset gives the calculated electron transfer number at various potentials).

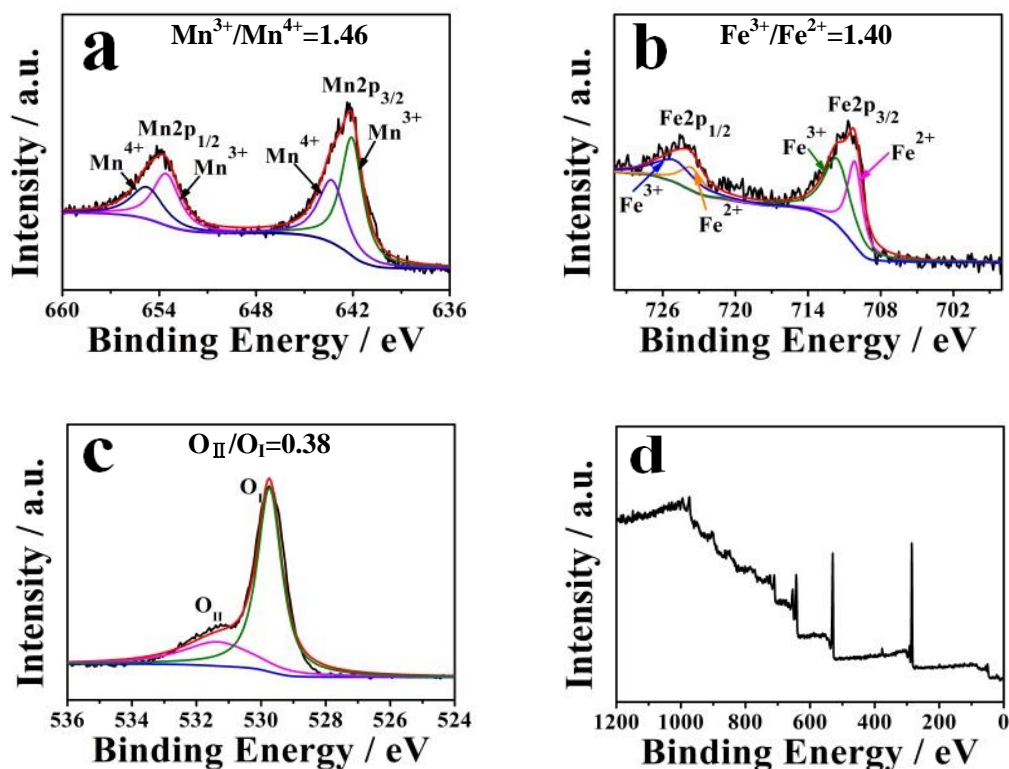

**Figure S8** High-resolution Mn 2p (a) and Fe 2p (b) and O 1s spectra (c) and XPS survey spectrum (d) of  $\text{MnO}_2/\text{Fe}_2\text{O}_3$ -400.

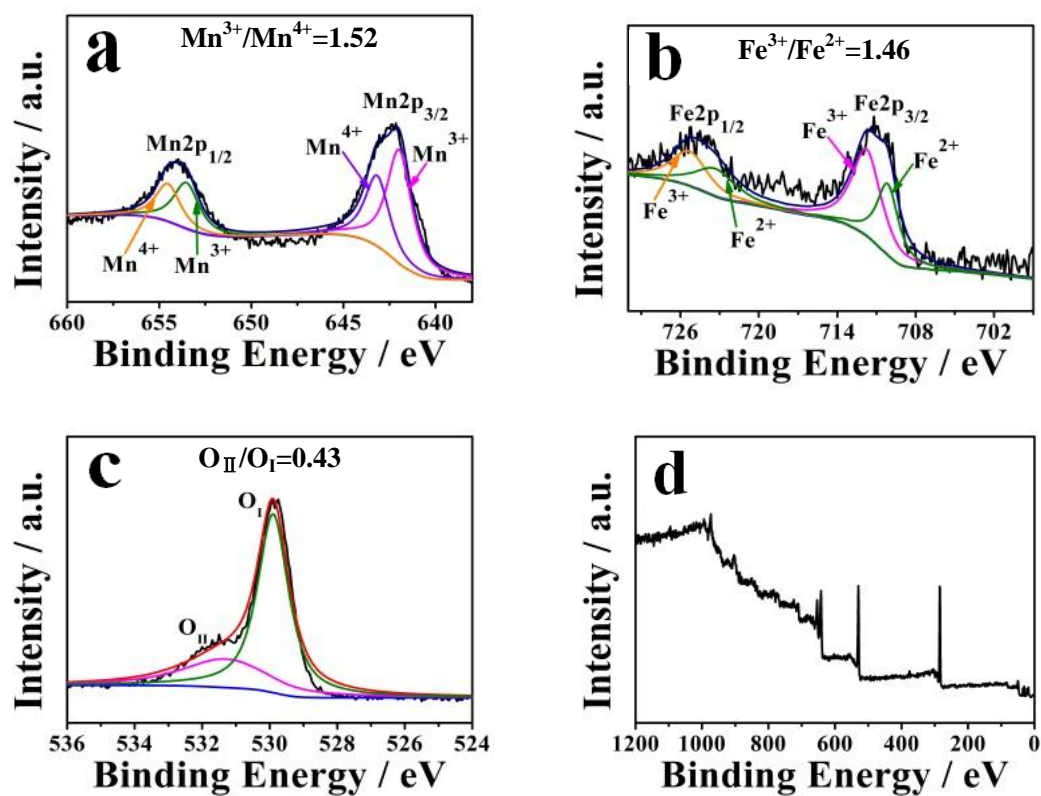

**Figure S9** High-resolution Mn 2p (a) and Fe 2p (b) and O 1s spectra (c) and XPS survey spectrum (d) of  $\text{MnO}_2/\text{Fe}_2\text{O}_3$ -600.

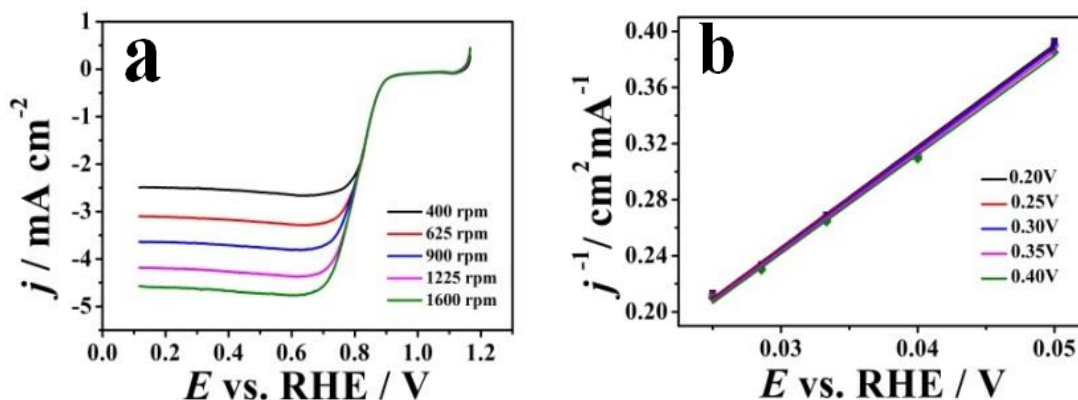

**Figure S10** (a) LSV curves of  $\text{MnO}_2/\text{Fe}_2\text{O}_3\text{-3.2}$  measured at different rotating rates; (b) Corresponding K-L plots of  $\text{MnO}_2/\text{Fe}_2\text{O}_3\text{-3.2}$  in various potential range (vs. RHE, the inset gives the calculated electron transfer number at various potentials).

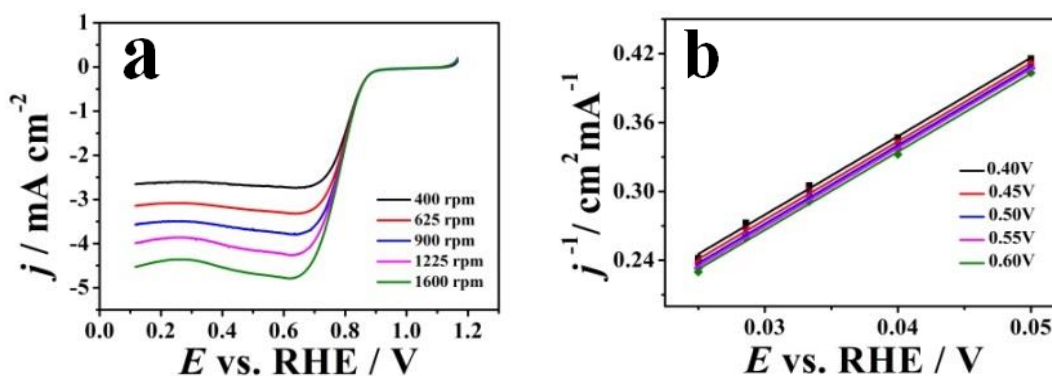

**Figure S11** (a) LSV curves of  $\text{MnO}_2/\text{Fe}_2\text{O}_3\text{-1.7}$  measured at different rotating rates; (b) Corresponding K-L plots of  $\text{MnO}_2/\text{Fe}_2\text{O}_3\text{-1.7}$  in various potential range (vs. RHE, the inset gives the calculated electron transfer number at various potentials).

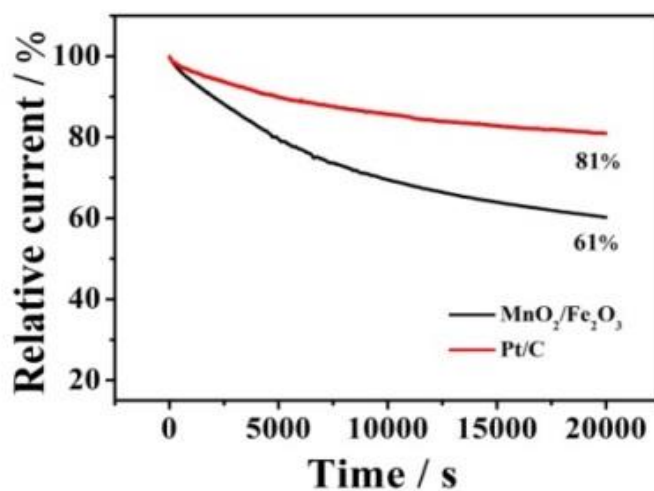

**Figure S12** Current-time chronoamperometric responses of  $\text{MnO}_2/\text{Fe}_2\text{O}_3/\text{N,P-C}$  and Pt/C.

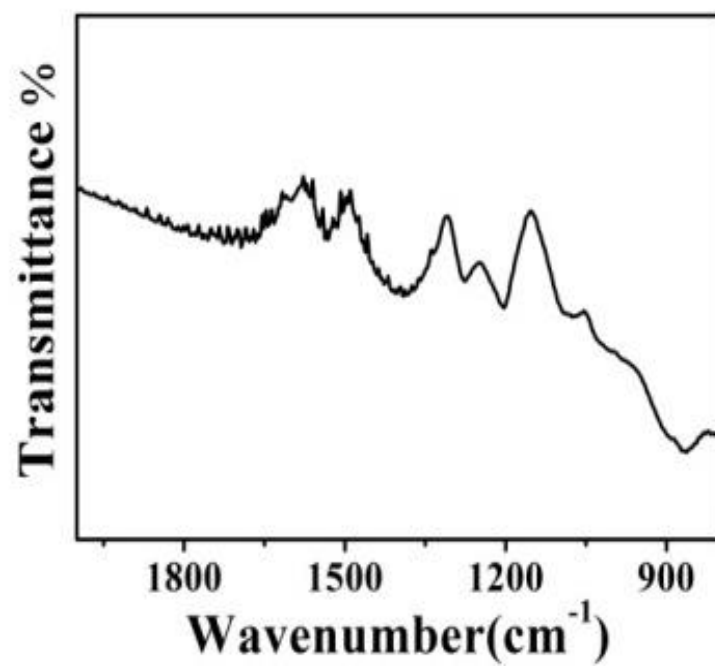

**Figure S13** FTIR spectrum of MnO<sub>2</sub>/Fe<sub>2</sub>O<sub>3</sub>/PANI.

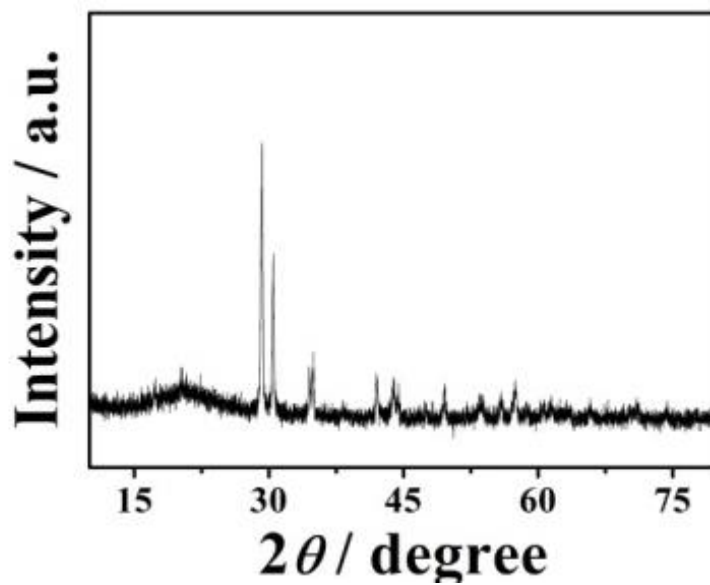

**Figure S14** XRD pattern of MnO<sub>2</sub>/Fe<sub>2</sub>O<sub>3</sub>/N,P-C.

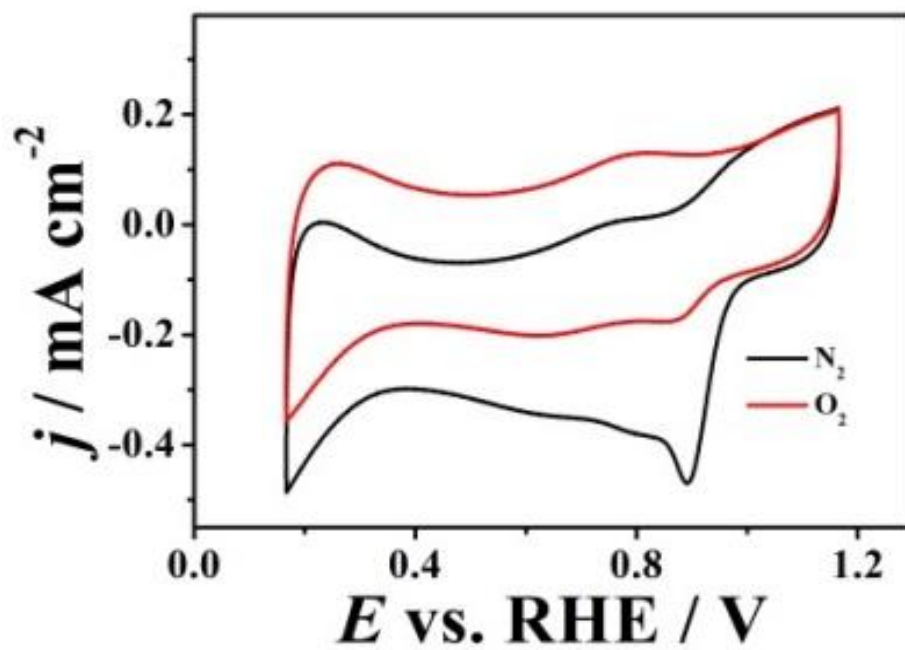

**Figure S15** (a) CV curves of  $\text{MnO}_2/\text{Fe}_2\text{O}_3/\text{N,P-C}$  in  $\text{N}_2$  and  $\text{O}_2$  saturated 0.1 M KOH.

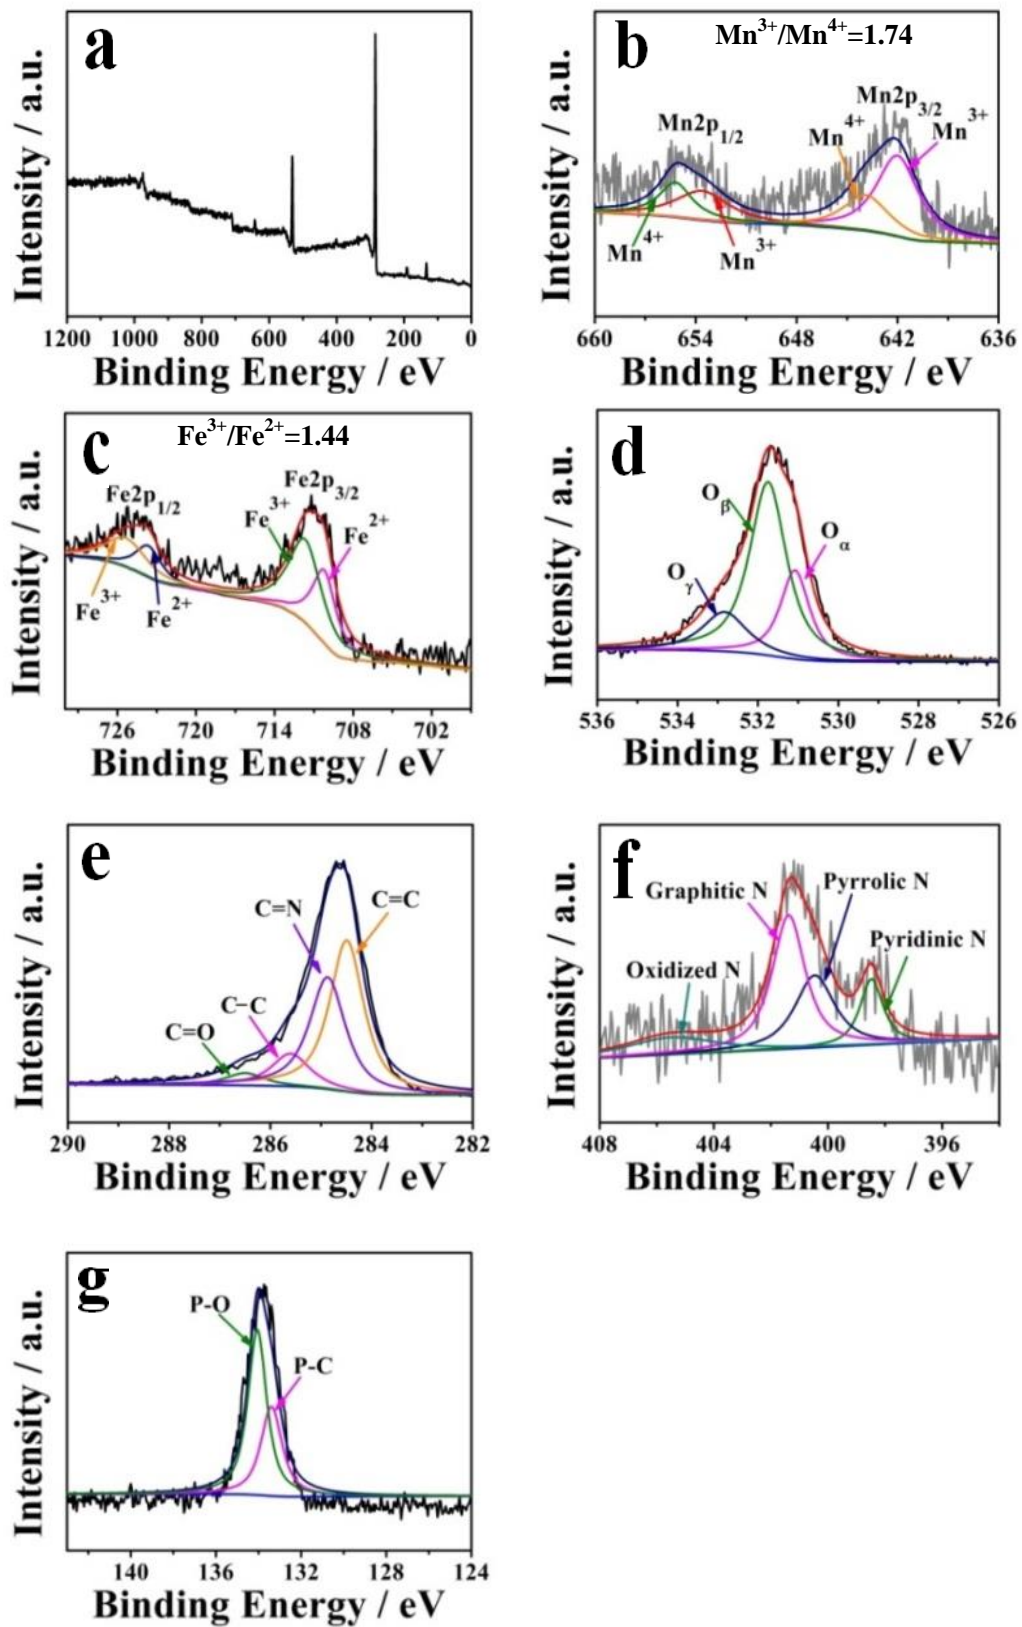

**Figure S16** XPS survey spectrum (a) and high-resolution Mn 2p (b), Fe 2p (c), O 1s (d), C 1s (e), N 1s (f) and P 2p (g) spectra of MnO<sub>2</sub>/Fe<sub>2</sub>O<sub>3</sub>/N,P-C.
